# Cardiovascular responses to progressive hypoxia in ducks native to high altitude in the Andes

Sabine L. Lague<sup>1\*</sup>, Catherine M. Ivy<sup>2</sup>, Julia M. York<sup>1,3</sup>, Beverly A. Chua<sup>1</sup>, Luis Alza<sup>4,5,6</sup>, Rebecca Cheek<sup>6</sup>, Neal J. Dawson<sup>2,4</sup>, Peter B. Frappell<sup>7</sup>, Anthony P. Farrell<sup>1</sup>, Kevin G. McCracken<sup>4,5,6</sup>, Graham R. Scott<sup>2</sup>, and William K. Milsom<sup>1</sup>

<sup>1</sup>Department of Zoology, University of British Columbia, BC, Canada

<sup>2</sup>Department of Biology, McMaster University, ON, Canada

<sup>3</sup>Department of Integrative Biology, University of Texas at Austin, TX, USA

<sup>4</sup>Department of Biology and Department of Marine Biology and Ecology, Rosenstiel School of Marine and Atmospheric Sciences, University of Miami, FL, USA

<sup>5</sup>Division of Ornithology, Centro de Ornitología y Biodiversidad, Peru

<sup>6</sup>Institute of Arctic Biology and University of Alaska Museum, University of Alaska Fairbanks, AK, USA

<sup>7</sup>Institute for Marine and Antarctic Studies, University of Tasmania, Tasmania, Australia

\* Corresponding author:

Sabine L. Lague

lague@zoology.ubc.ca

**Key words:** high altitude, cardiovascular, heart rate, duck, haemoglobin, hypoxia

**Summary Statement:** An increased blood-oxygen carrying capacity provides high altitude ducks in the Andes with a greater reserve for O<sub>2</sub> delivery in hypoxia.

## ABSTRACT

The cardiovascular system is critical for delivering O<sub>2</sub> to tissues. Here we examine the cardiovascular responses to progressive hypoxia in four high-altitude Andean duck species compared to four related low-altitude populations in North America, tested at their native altitude. Ducks were exposed to stepwise decreases in inspired partial pressure of O<sub>2</sub> while we monitored heart rate, O<sub>2</sub> consumption rate, blood O<sub>2</sub> saturation, haematocrit (Hct), and blood haemoglobin concentration [Hb]. We calculated O<sub>2</sub> pulse (the product of stroke volume and the arterial-venous O<sub>2</sub> content difference), blood O<sub>2</sub> concentration, and heart rate variability. Regardless of altitude, all eight populations maintained O<sub>2</sub> consumption rate with minimal change in heart rate or O<sub>2</sub> pulse, indicating that O<sub>2</sub> consumption was maintained by either a constant arterial-venous O<sub>2</sub> content difference (an increase in the relative O<sub>2</sub> extracted from arterial blood) or by a combination of changes in stroke volume and the arterial-venous O<sub>2</sub> content difference. Three high-altitude taxa (yellow-billed pintails, cinnamon teal, and speckled teal) had higher Hct and [Hb], increasing the O<sub>2</sub> content of arterial blood, and potentially providing a greater reserve for enhancing O<sub>2</sub> delivery during hypoxia. Hct and [Hb] between low- and high-altitude populations of ruddy duck were similar, representing a potential adaptation to diving life. Heart rate variability was generally lower in high-altitude ducks, concurrent with similar or lower heart rates than low-altitude ducks, suggesting a reduction in vagal and sympathetic tone. These unique features of the Andean ducks differ from previous observations in both Andean geese and bar-headed geese, neither of which exhibit significant elevations in Hct or [Hb] compared to their low-altitude relatives, revealing yet another avian strategy for coping with high altitude.

## INTRODUCTION

A major role of the cardiovascular system is to maintain adequate delivery of oxygen ( $O_2$ ) to the tissues to support rates of  $O_2$  consumption ( $\dot{V}O_2$ ) both at rest and during periods of increased activity. This becomes challenging when the environmental partial pressure of  $O_2$  ( $PO_2$ ) falls, such as at high altitude (hypobaric hypoxia). In species adapted to live under hypoxic (low  $O_2$ ) conditions, cardiovascular enhancements to improve tissue  $O_2$  transport have arisen from many sources (e.g. larger hearts and thus larger stroke volumes, expansion of vascular networks to enhance tissue diffusion capacity, increased haematocrit (Hct), changes in protein sequence and structure that increase haemoglobin (Hb)- $O_2$  binding affinity, and/or increases in heart rate) (Black and Tenney, 1980; Faraci, 1991; Jessen et al., 1991; Butler, 2010; Scott et al., 2015). Studies have now shown that high-altitude resident Andean geese (*Chloephaga melanoptera*) and crested ducks (*Lophonetta specularioides alticola*) have evolved fundamentally different mechanisms for maintaining  $O_2$  supply during hypoxia than bar-headed geese (*Anser indicus*) that migrate transiently at high altitude. Bar-headed geese respond to hypoxia with robust increases in ventilation and heart rate, whereas Andean species increase lung  $O_2$  extraction and cardiac stroke volume (Black and Tenney, 1980; Lague et al., 2016; Lague, 2017; Lague et al., 2017). Neither of these species exhibits significant elevations in Hct or blood Hb concentration compared to their low-altitude relatives (Black and Tenney, 1980; Lague et al., 2016) but both species have Hb with high  $O_2$  affinity (Black and Tenney, 1980; Weber et al., 1993). Based on these data, it was suggested that transient high-altitude performance has favoured the evolution of robust convective  $O_2$  transport recruitment in hypoxia (increased breathing frequency and heart rate), whereas lifelong high-altitude residency has favoured the evolution of enhancements to the lungs and heart that increase lung diffusion and stroke volume (Lague, 2017).

The extent to which these cardiovascular features of high-altitude resident Andean geese and crested ducks are common to other high-altitude resident bird species, however, is unknown. Recently populations of several duck species (family Anatidae) from multiple high-altitude sites in Perú (e.g., Lake Titicaca at ~3800 m above sea level; Chancay River at ~3000-4100 m) were compared to low-altitude populations of the same species or to closely related lowland congeners to test the effect of high-altitude colonization on the hypoxic ventilatory responses and respiratory mechanics via independent comparisons (York et al., 2017; Ivy et al., 2019). Genetically-based increases in Hb- $O_2$  binding affinity (McCracken et al., 2009a; Natarajan et al., 2015), reductions in work of breathing (York et al., 2017), and

increases in pulmonary ventilation (Ivy et al., 2019) were observed in some highland taxa but not in others. This suggests that the hypoxia responses of closely-related resident species that independently colonized high altitude might be divergent.

The purpose of the present study, therefore, was to compare the components of O<sub>2</sub> transport capacity in the same high-altitude resident species and their low-altitude resident sister populations. This approach allowed four independent comparisons of the effect of adaptation to high altitude on cardiovascular O<sub>2</sub> transport. All of these species are derived from low-altitude waterfowl populations (Johnson and Sorenson, 1999), but exhibit differences in genetic divergence that are suggestive of varying degrees of genetic isolation and evolutionary time at high altitude (McCracken et al., 2009b; Wilson et al., 2013; Munoz-Fuentes et al., 2013; Graham et al., 2018). We wished to determine whether the high-altitude populations would demonstrate convergent or divergent enhancements in circulatory O<sub>2</sub> transport during progressive hypoxia, and the extent to which their responses to hypoxia were similar or distinct from those observed in previous studies of the high-altitude resident Andean goose and the high-altitude migrant bar-headed goose (Lague et al., 2017).

## MATERIALS AND METHODS

### Waterfowl

Our study was conducted in conjunction with Ivy et al. (Ivy et al., 2019), and the cardiovascular measurements documented in this present manuscript were acquired simultaneously from eight of the same species. As described earlier (Ivy et al., 2019), four of the species of ducks were captured and tested at high altitude (3,812 m) at the Lake Titicaca National Reserve (near Puno, Peru) in August 2014: yellow-billed pintails (*Anas georgica*;  $0.61 \pm 0.02$  kg, N = 12) cinnamon teals (*Spatula cyanoptera orinomus*;  $0.44 \pm 0.01$  kg, N = 12), ruddy ducks (*Oxyura jamaicensis ferruginea*;  $0.73 \pm 0.07$  kg, N = 6), and speckled teals (*Anas flavirostris oxyptera*;  $0.37 \pm 0.01$ , N = 10). Subsequently in July 2015, four related low-altitude taxa, were captured at low altitude in Oregon, USA (at either Summer Lake Wildlife Area at 1,260 m or Malheur National Wildlife Refuge at 1,256 m), and were tested at Summer Lake Wildlife Area: northern pintails (*Anas acuta*;  $0.84 \pm 0.01$  kg, N = 10), cinnamon teals (*Spatula c. septentrianolium*;  $0.31 \pm 0.01$  kg, N=11), ruddy ducks (*Oxyura j. jamicensis*;  $0.42 \pm 0.04$  kg, N = 8), and green-winged teals (*Anas crecca carolinensis*;  $0.29 \pm 0.01$  kg, N = 10).

Comparisons were made at either the subspecies level (high versus low-altitude populations comprising subspecies for cinnamon teal and ruddy duck) or the species level

(high-altitude yellow-billed pintail versus low-altitude northern pintail and high-altitude speckled teal versus low-altitude green-winged teal). Among these, the yellow-billed pintail and cinnamon teal are the most recent species to diverge from their low-altitude ancestor(s) and arrive at high altitude based on mitochondrial DNA divergence (McCracken et al. 2009b; Wilson et al., 2013). The speckled teal has had the longest time at altitude since diverging from its low-altitude ancestors (Graham et al., 2018). The ruddy duck likely lies more intermediate in evolutionary time since divergence from its low-altitude ancestors (Munoz-Fuentes et al., 2013).

Mallard ducks (*Anas platyrhynchos*;  $0.96 \pm 0.02$  kg, N = 8), and gadwalls (*Mareca strepera*;  $0.75 \pm 0.04$  kg, N = 8) were also captured in Oregon and puna teals (*Spatula puna*;  $0.40 \pm 0.01$  kg, N = 8) at Lake Titicaca. Since we do not have data from sister taxa for these groups the data we obtained from them is included only in the supplemental material. They do provide data for one additional high-altitude species and two other low-altitude species,

All ducks were held overnight to recover from capture (at least 6-12 h) prior to experimentation. The birds were held in large animal kennels with dry bedding and unlimited access to water. They were tube-fed a slurry of commercial duck chow if held for longer than 1 day in captivity, but deprived of food 6-12 hours before measurements took place. Ducks were collected in accordance with permits issued by the Ministerio del Ambiente del Peru (004-2014-SERNANP-DGANP-RNT/J), Ministerio de Agricultura del Peru (RD 169-2014-MINAGRI-DGFFS/DGEFFS and 190-2015-SERFOR-DGGSPFFS, U.S. Fish and Wildlife Service Migratory Bird Treaty Act I/E (MB68890B-0), and Oregon Department of Fish and Wildlife (Scientific Taking Permit 101-15). All experimental procedures followed guidelines established by the Canadian Council on Animal Care, and were approved by institutional animal care committees.

### Acute hypoxic responses

We measured the cardiovascular and metabolic responses to acute hypoxia using techniques similar to those used previously for Andean geese and bar-headed geese (Lague et al., 2016; Ivy et al., 2019). Ducks were placed in a cradle that allowed unrestricted breathing, with their head in a 4 L opaque chamber that was sealed around the neck with a latex collar and provided with ambient air supplied to the head chamber at  $5 \text{ l min}^{-1}$ . Flow-through respirometry was used to measure  $\text{O}_2$  consumption. The birds were outfitted with a three-lead ECG to measure heart rate and heart rate variability. Arterial  $\text{O}_2$  saturation was also measured in a subset of birds, for which a 3-cm tall band was plucked free of feathers on their necks to

accommodate a MouseOx Pulse Oximeter (Starr Life Sciences, PA, USA). Ducks were given 60-90 min to adjust to the apparatus prior to beginning measurements, by which time they exhibited a stable, slow breathing pattern and routine heart rate. Measurements of heart rate and metabolism under these ambient conditions ( $\sim 13$  or  $18$  kPa  $O_2$  at high- or low- altitude, respectively) were recorded for an additional 25 min, after which ducks were exposed to 25-min stepwise decreases in inspired  $O_2$  tension ( $PO_2$ ): 13 (for low-altitude ducks only), 12, 9, 7, and 6 kPa, followed by a 25-min recovery to ambient  $PO_2$ . Dry incurrent air and nitrogen were mixed using pre-calibrated rotameters (Matheson Model 7400 Gas Mixer, E700 and E500 flowtubes, Oakville, ON, Canada) at a flow rate of  $5-10$  L  $min^{-1}$  to achieve each level of hypoxia. At the end of the experiment, blood was collected from most birds (see below) by pricking a superficial leg vein with a lancet. Haematocrit (%) was determined in duplicate by a Zipocrit haematocrit centrifuge (LW Scientific, Lawrenceville, GA, USA). Haemoglobin concentration ( $g\ dl^{-1}$ ) was acquired at the end of the experiment using a Hemocue Hb 201<sup>+</sup> System (Ängelholm, Sweden). A subset of representative individuals were euthanized with an overdose of intravenous propofol, as the number of euthanized individuals was limited due to permit regulations (3 northern pintails, 3 low-altitude cinnamon teals, 5 low-altitude ruddy ducks, 2 green-winged teals, 6 yellow-billed pintails, 10 high-altitude cinnamon teals, 8 high-altitude ruddy ducks, and 6 speckled teals), and heart mass was measured. Total heart mass is reported standardized to body mass ( $g\ kg^{-1}$ ).

### Measurements and data analysis

Heart rate, metabolism, and arterial  $O_2$  saturation were measured continuously during the hypoxia exposures, and we report the average values across the last 10 min at each inspired  $PO_2$ . The excurrent air leaving the head chamber was subsampled at  $200\ ml\ min^{-1}$ , dried with silica gel (MLA6024, ADInstruments, Colorado Springs, CO, USA), and passed through  $CO_2$  and  $O_2$  analyzers (FOXBOX, Sable Systems, Las Vegas, NV, USA). These data were used to calculate  $\dot{V}O_2$ , as described by Lighton (Lighton, 2008), and expressed here in volume units at standard temperature and pressure dry (STPD). The ECG was continuously monitored using a PowerLab Bio Amp (ADInstruments, Colorado Springs, CO, USA) and analyzed using PowerLab analysis software (ADInstruments, Colorado Springs, CO, USA) at a sampling frequency of  $1000\ Hz$  per channel. All of the above data were acquired using a PowerLab 16/32 and Labchart 8 Pro software (ADInstruments). A 5-min interval at the 15-minute time point of each exposure was analyzed using PowerLab heart rate variability analysis software (ADInstruments, Colorado Springs, CO, USA). RMSSD (root mean

squared of the successive differences in ms), the most common time domain measure for heart rate variability, and SDRR (standard deviation of the R-R interval in ms), a measure of total variability, were derived from this program (Khandoker et al., 2013). Cardiac O<sub>2</sub> pulse (ml O<sub>2</sub> kg<sup>-1</sup>) was calculated as the quotient of  $\dot{V}O_2$  and heart rate. Arterial O<sub>2</sub> content was calculated from measures of [Hb] and arterial O<sub>2</sub> saturation (Table S1). We multiplied the molar Hb concentration by 4 and by fractional O<sub>2</sub> saturation to get the molar O<sub>2</sub> content. Arterial O<sub>2</sub> saturation was measured in all low-altitude species. It was only measured in a subset of the high-altitude ducks (speckled teal: N = 6; Andean ruddy duck: N = 5; yellow-billed pintail: N = 6; cinnamon teal: N = 5). For the speckled teal we obtained O<sub>2</sub> saturation data from birds from which we did not get blood samples. As a result, for these species, we used the mean values of Hb concentration for the species and multiplied them by the individual O<sub>2</sub> saturation values to estimate arterial O<sub>2</sub> content values.

## Statistical Analysis

Two-factor ANOVA was used to examine the main effects and interactions of altitude and acute inspired PO<sub>2</sub> (repeated measure) within each independent pair of closely related high-altitude and low-altitude taxa. We tested for pairwise differences between populations/species within each inspired PO<sub>2</sub> using Holm-Sidak post-tests. Comparisons between groups began at 13 kPa. Variables were transformed when they did not meet assumptions for either normality or equal variance analyzed for a two-way repeated measures ANOVA. Student t-tests were used to compare haematocrit, Hb concentration, and heart mass relative to body mass between high-low altitude pairs. Tests that failed normality were run with a Mann-Whitney Rank Sum Test.

Statistical analyses were carried out using SigmaStat (version 3.0; Systat Software) with a significance level of  $P < 0.05$ . Values are reported as mean  $\pm$  S.E.M.

## RESULTS

### Progressive hypoxic exposure

Despite the progressive fall in inspired PO<sub>2</sub>, all eight duck taxa maintained their  $\dot{V}O_2$  (Fig. 1).  $\dot{V}O_2$  was similar between the low- and high-altitude populations of three of the four high-low pairs. It was elevated in the high-altitude yellow-billed pintails compared to the northern pintails at the lower levels of P<sub>I</sub>O<sub>2</sub> ( $P = 0.007$ ).



All of the duck populations maintained heart rate during progressive hypoxic exposure (Fig. 2). The heart rate of low-altitude green-winged teals was significantly greater than that of high-altitude speckled teals across all  $PO_2$  ( $P < 0.003$ ). Similarly, low-altitude cinnamon teals exhibited a higher overall heart rate than their high-altitude counterparts ( $P = 0.019$ ), which was particularly evident at the three most severe levels of hypoxia even though there was no significant effect of hypoxia within either population.

Cardiac  $O_2$  pulse was calculated as the quotient of  $\dot{V}O_2$  and heart rate (Fig. 3), which from the Fick equation equals the product of stroke volume and the difference between arterial and venous  $O_2$  content. Seven of the duck populations maintained  $O_2$  pulse during progressive hypoxic exposure, whereas  $O_2$  pulse increased transiently during hypoxic exposure in the high-altitude yellow-billed pintails ( $P < 0.001$ ). Both yellow-billed pintails and speckled teal ( $P = 0.028$ ) had a higher  $O_2$  pulse than their low-altitude counterparts at the most severe level of hypoxia.

The mean SDRR (Fig. 4) and RMSSD (Fig. 5) did not change significantly during either hypoxic exposure or ambient recovery in any group, except for a modest increase in SDRR and RMSSD in high-altitude ruddy ducks at 6 kPa  $O_2$  and a slight drop in RMSSD in the green-winged teal at 6 kPa  $O_2$  ( $P = 0.035$ ). Nevertheless, except for the comparison between high-altitude yellow-billed pintails and low-altitude northern pintails, SDRR and RMSSD were significantly lower in the high-altitude taxa of all high-low altitude pairs. High-altitude ruddy ducks and high-altitude speckled teals exhibited a lower SDRR than their low-altitude counterparts at all exposure levels ( $P < 0.001$ ), and high-altitude cinnamon teals exhibited a lower SDRR than low-altitude cinnamon teals at all exposure levels except ambient (Figs. 4, 5). Thus, the high-altitude groups generally exhibited lower SDRR and RMSSD compared to the low-altitude groups.

### Blood $O_2$ content

Progressive hypoxia significantly decreased arterial  $O_2$  content in all groups of ducks (Fig. 6). In three of the four high-low pairs, the high-altitude population exhibited significantly higher arterial  $O_2$  content than its low-altitude counterpart except at the most severe levels of inspired  $PO_2$ . This was largely a result of increases in blood Hb content, as both Hb content and haematocrit were higher in the high-altitude population of each of these three high-low pairs (Table 1). In only the yellow-billed pintail did differences in arterial  $O_2$  content also result from increases in arterial  $O_2$  saturation (Table S1). The high-altitude ruddy



duck was the exception among the high-low pairs, with no significant differences in haematocrit, Hb concentration or O<sub>2</sub> content between highland versus lowland populations, and unlike the other species in our study, no significant differences in Hb-O<sub>2</sub> affinity between low- and high-altitude ruddy duck populations (Natarajan et al., 2015).

Heart mass relative to body mass was generally similar between high-low pairs. An exception to this was that heart mass relative to body mass was significantly greater in high-altitude speckled teals compared to low-altitude green-winged teals ( $P = 0.028$ ). A similar difference in heart mass in high-altitude cinnamon teals compared to low-altitude cinnamon teals was marginally insignificant ( $P = 0.052$ ) (Table 1).

### **Post-hypoxic recovery**

In all populations arterial O<sub>2</sub> content returned to starting values within 5 min of return to breathing ambient air (data not shown). Heart rate, however, tended to increase during recovery in all groups (Fig. 7), reaching statistical significance in four of the eight populations (low-altitude northern pintails ( $P < 0.001$ ), both high- and low-altitude cinnamon teal populations ( $P < 0.001$ ), and low-altitude green winged teals ( $P < 0.001$ )). Heart rate was also significantly higher at 5- and 20-min of recovery in all low-altitude groups compared to their related high-altitude pair with the exception of high- and low-altitude ruddy ducks, whose heart rates did not differ significantly. O<sub>2</sub> pulse tended to decrease relative to normoxic starting values during the post-hypoxic recovery in all groups (Fig. 7). This decrease was significant in low-altitude northern pintails ( $P = 0.004$ ), high-altitude yellow-billed pintails ( $P < 0.001$ ), low-altitude cinnamon teals ( $P < 0.001$ ), and high-altitude speckled teals ( $P = 0.002$ ) (Fig. 7). Since  $\dot{V}O_2$  did not change during recovery, the changes in heart rate and O<sub>2</sub> pulse tended to compensate each other.

The responses to stepwise hypoxia exposure in the high-altitude Puna teal, low-altitude gadwall, and low-altitude mallard, for which there were no corresponding low/high altitude pairs, are provided in the supplemental materials: arterial O<sub>2</sub> saturation (Table S1);  $\dot{V}O_2$ , heart rate, O<sub>2</sub> pulse, arterial O<sub>2</sub> content, SDRR, and RMSSD (Table S2); hematological parameters, body mass, and relative heart mass (Table S3).

## DISCUSSION

The present study compared the cardiovascular responses to progressive hypoxia exposure in four species of high-altitude duck to those of four closely related low-altitude ducks that represent sister populations/subspecies or congeneric species. In general, all eight taxa maintained  $O_2$  consumption rate with little, if any, change in heart rate or  $O_2$  pulse during hypoxia. Heart rates were significantly lower in the high-altitude taxon in half of the species pairs. The most overarching difference between high- and low-altitude populations was in blood  $O_2$  content and hence in blood  $O_2$  carrying capacity, which was higher in all high-altitude species except for the ruddy duck. Finally, there were intriguing differences between species pairs that are discussed in terms of convergence/divergence and time at altitude in the sections that follow.

### Progressive hypoxic exposure

During progressive hypoxic exposure all birds maintained  $\dot{V}O_2$  (Fig. 1) indicating that  $O_2$  delivery was likely not limiting  $\dot{V}O_2$  even at 6 kPa  $PO_2$ . Heart rate also generally remained constant during progressive hypoxia in all taxa (Fig. 2). This is similar to what has been reported in previous studies on other Andean waterfowl, such as Andean geese and crested ducks (Lague et al., 2017). By contrast, several studies on bar-headed geese identified a strong tachycardia in response to hypoxia (Faraci, 1991; Black and Tenney, 1980; Lague et al., 2016). Heart rate variability was unaffected by hypoxia in any species.

The  $O_2$  pulse (the product of stroke volume and arterial-venous  $O_2$  content difference) also did not change with progressive hypoxia (except in the yellow-billed pintail at 9 and 7 kPa  $O_2$ , but not 6 kPa  $O_2$ ), despite declines in arterial  $O_2$  content of more than 50%. If stroke volume and the arterial-venous  $O_2$  content difference remained constant, venous  $PO_2$  must have been very low. It is also possible that the arterial-venous difference in  $O_2$  content was reduced, ameliorating the reduction in venous  $PO_2$  and helping retain the diffusion gradient, while the stroke volume increased to offset this decline and maintain a constant  $O_2$  pulse. This is highly speculative but would be consistent with recent studies on Andean geese, crested ducks, bar-headed geese, and barnacle geese (*Branta leucopsis*) (Lague et al., 2016; Lague et al., 2017).

## Comparisons between low- and high-altitude species

For the ruddy ducks, there were no differences between high and low-altitude populations for any variable measured or calculated other than heart rate variability. Ruddy ducks were the only diving species in this study, however, and many diving mammals and birds exhibit enhanced Hb concentration and Hb-O<sub>2</sub> affinity commensurate with the use of blood as an O<sub>2</sub> store for diving (Butler, 2001; Kooyman and Ponganis, 1998; Meir and Ponganis, 2009). In ruddy ducks for example, the low- and high-altitude populations exhibit a relatively high Hb-O<sub>2</sub> affinity that does not differ significantly between populations, nor does it differ from the other high-altitude waterfowl populations ( $P_{50} = 28.5\text{--}30.0$  at standard concentrations of KCl and IHP; Table S2 in Natarajan et al. 2015). The diving lifestyle thus may account for the elevated Hb concentration and Hb-O<sub>2</sub> affinity and arterial O<sub>2</sub> content seen in even low-altitude ruddy ducks. Note that the responses of the high-altitude ruddy ducks were similar to those of all the other high-altitude species; it is the low-altitude population that differs.

For two of the other three matched pairs,  $\dot{V}O_2$  was similar between high- and low-altitude counterparts.  $\dot{V}O_2$  was higher in the yellow-billed pintail than in the northern pintail, this was because the northern pintail had a relatively low  $\dot{V}O_2$  compared to all other species. The  $\dot{V}O_2$  of the yellow-billed pintails was similar to that of all the other species. Interestingly, the heart rate was lower in the high-altitude cinnamon teals and speckled teals compared to their low-altitude counterparts but this was not the case for the yellow-billed pintails compared to the northern pintails. This, however, again reflects the low heart rates in the northern pintails. The heart rates of the yellow-billed pintails were similar to those of the other high-altitude species.

Hematocrit and Hb concentration were significantly higher in all high-altitude groups except the ruddy ducks. Also, the Hb-O<sub>2</sub> affinity values from the literature are higher (i.e.  $P_{50}$  values are lower) in the two high-altitude groups studied here compared to their close low-altitude relatives for which there are data (Natarajan et al., 2015) (Table 1). The increased Hb-O<sub>2</sub> binding affinity in the high-altitude birds is consistent with data for many animals endemic to high altitude (Natarajan et al., 2015; Storz, 2010; Storz, 2016). The net result was that the arterial O<sub>2</sub> content was elevated in all of the high-altitude birds with the exception of ruddy duck giving the high-altitude populations a larger reserve for increasing circulatory O<sub>2</sub> supply during hypoxia.

Despite the benefit to O<sub>2</sub> carrying capacity, increases in haematocrit and Hb concentration increase blood viscosity, and when large enough (polycythemia) are thought to be maladaptive because the increased blood viscosity increases resistance to blood flow and places greater demands on the heart (Smith et al., 2000; Dempsey and Morgan, 2015). The relative contributions of evolutionary adaptation and environmentally-induced phenotypic plasticity to the variation in haematology are unclear. Increases in haematocrit and Hb concentration are a common occurrence in sojourners that acclimatize to altitude, as well as for many native highlanders with widely different durations of hypoxic exposure in their ancestry (e.g. from 3 to 4 generations in the natives of Leadville, Colorado to 40 to 50 generations in Andean natives) (Dempsey and Morgan, 2015). They are not present, however, in Tibetan natives with 30,000 years of exposure to altitudes above 3,000 m (Dempsey and Morgan, 2015), potentially due to allelic differences at the *EPAS1* locus, which encodes hypoxia inducible factor 2 $\alpha$  (HIF2 $\alpha$ ) (Simonson et al., 2010). High-altitude acclimation increased haematocrit and Hb concentration in populations of both high- and low-altitude deer mice raised at low altitude, but less so in the high-altitude populations (Lui et al., 2015). Low-altitude Pekin ducks (domestic mallard) acclimated to simulated high altitude (5,640 m) increased haematocrit from 45.4% to 55.9% (Black and Tenney, 1980); however, in bar-headed geese, haematocrit and Hb concentration were unchanged when acclimated to the same simulated high-altitude conditions (5,640 m) (Black and Tenney, 1980) or when reared at high altitude (3,200 m) (Lague et al., 2016; Lague et al., 2017).

### **Heart Rate Variability**

High-altitude ducks generally exhibited less heart rate variability (HRV, as quantified by SDRR and RMSSD) than closely-related low-altitude waterfowl species or populations. The only exception was the lack of significant difference between the HRV of low-altitude northern pintails and high-altitude yellow-billed pintails. This finding was contrary to our hypothesis, as well as to findings in the literature for rats and humans acclimated to high altitude (Cornolo et al., 2004; Melin et al., 2003; Sharshenova et al., 2006). The relationship between heart rate and HRV is complex and generally understudied even in mammals (Coumel et al., 1994k). However, it has been shown in human studies that increases in heart rate are typically associated with decreases in HRV (and vice versa) (Coumel et al., 1994; Mangin et al., 1998; Melin et al., 2003), and this decreased HRV is generally believed to reflect increased sympathetic activity and decreased vagal tone (Bernardi et al., 2001;

Hughson et al., 1994). Indeed, studies on mammals suggest that the increases in heart rate during acute hypoxia result from increased sympathetic activity and reduced vagal tone. This shift in autonomic balance leads to a reduction in beat-to-beat HRV that reduces chronotropic responses. Chronic exposure to hypoxia leads to a reduction in  $\beta$ -adrenoreceptor expression in the left cardiac ventricle of rats (Kacimi et al., 1992), as well as to a decrease in adrenoreceptor density in the right ventricle (Morel et al., 1999). The net result is to reduce the impact of hypoxia on HRV and restore chronotropic sensitivity. The lower HRV with normal or lower heart rates in the high-altitude ducks suggests that both vagal tone and sympathetic tone could be significantly reduced. The reduced vagal tone would reduce the HRV while a concomitant reduction in sympathetic tone would be required to prevent heart rate from rising. This is an intriguing possibility that remains to be explored, though there is some evidence that high-altitude pikas (*Ochotona* spp.) exhibit blunted parasympathetic and sympathetic modulation of heart rate, in association with reduced expression of muscarinic m2 receptors and  $\beta_1$ -adrenoreceptors in the cardiac ventricles (Pichon et al., 2013). A reduction in the importance of the sympathetic nervous system may also have evolved in high-altitude deer mice, in which catecholamine release from the adrenal medulla is blunted in association with reductions in the expression of enzymes involved in catecholamine biosynthesis (Scott et al. 2019; Schweizer et al. 2019). Although the mechanisms underlying the observed changes in HRV in high-altitude ducks remain to be discovered, our results here are consistent with these previous studies suggesting that changes in autonomic tone may be involved in coping with the challenges at high altitude.

### **Post-hypoxic recovery**

Although heart rate and  $O_2$  pulse did not change significantly during progressive hypoxia, recovery from severe hypoxia was associated with a general tachycardia and reduced  $O_2$  pulse. Since  $\dot{V}O_2$  did not change, the two compensated for each other. These changes were present up to 20 min after the animals had returned to breathing ambient levels of  $O_2$ . This suggests that the changes were not in response to the progressive hypoxia, raising the possibility that they were a response to a metabolic acidosis that may have developed during exposure to the most severe levels of hypoxia, a suggestion that remains to be explored.

## Time at altitude

The high-altitude speckled teal diverged from their low-altitude ancestors approximately one million years ago or more, as probably did the Andean goose (Graham et al., 2018; McCracken unpubl. data). In contrast, the populations of yellow-billed pintails, cinnamon teal, and ruddy ducks have likely only been established at altitude for multiples of tens of thousands of years, as estimated by population divergence times calculated from genetic data (McCracken et al., 2009b; Wilson et al., 2013; Munoz-Fuentes et al., 2013). Ignoring the ruddy ducks again, the data suggest that the primary adaptations seen here (increased [Hb] and Hb-O<sub>2</sub> affinity) evolved quickly. While the yellow-billed pintail/northern pintail pair exhibit differences not seen in the cinnamon teals and the speckled teal/green winged teal pair, this was due to differences in the responses of the low-altitude populations.

## CONCLUSIONS

The purpose of the present study was to compare the effects of hypoxia on the circulatory O<sub>2</sub> transport in the high-altitude populations of four different duck species with low-altitude populations of the same species or closely related low-altitude congeners. Specifically, we asked whether the high-altitude species/populations would demonstrate convergent patterns of enhanced circulatory O<sub>2</sub> transport during progressive hypoxia similar to that of the resident Andean goose and distinct from that of the migratory bar-headed goose, or whether these species would exhibit divergent responses to high altitude.

Surprisingly, all species, low and high-altitude residents, were able to maintain relatively constant levels of O<sub>2</sub> consumption down to 6 kPa inspired O<sub>2</sub> and did so with no change in heart rate. The O<sub>2</sub> pulse also did not change indicating that O<sub>2</sub> consumption was maintained by either maintaining a constant a-vO<sub>2</sub> difference (which would represent an increase in the relative % O<sub>2</sub> extracted from arterial blood) or by some combination of changes in stroke volume and the arterial-venous O<sub>2</sub> content difference.

What differentiated high- vs low-altitude ducks for three of the four high-altitude duck taxa was their higher arterial O<sub>2</sub> content in association with higher blood Hb concentrations and Hb-O<sub>2</sub> affinities. A different three of four highland duck taxa exhibited lower heart rate variability, which when combined with heart rates that were similar or lower than those in lowland taxa, suggest potential reductions in both vagal tone and sympathetic tone. The exception was the ruddy ducks for which no differences were found in any variable measured between the low and high-altitude populations, which is hypothesized to reflect

adaptation of the low-altitude population for diving (or exaptation in the case of the high-altitude population). Therefore, several high-altitude resident populations exhibited similar responses to high altitude reflecting a high degree of convergence. However, they differed in some respects from Andean geese, crested ducks, and bar-headed geese (Lague et al., 2017), none of which exhibit increased haematocrit or total Hb concentration at high altitude (Black and Tenney, 1980; Lague et al., 2016; Lague et al., 2017), reflecting some divergence across waterfowl in the strategies used to cope with chronic hypoxia. In sum, across all these species, we have identified a surprisingly diverse set of physiological trait combinations, further supporting the hypothesis that evolution is both predictable and idiosyncratic. It can converge on the same basic phenotype via a multitude of different pathways. The unique responses of these Andean ducks reveal yet another avian strategy for coping with high altitude.



## LIST OF SYMBOLS AND ABBREVIATIONS

|                 |                                                |
|-----------------|------------------------------------------------|
| HA              | high altitude                                  |
| Hb              | haemoglobin                                    |
| HIF2A           | hypoxia inducible factor 2 alpha               |
| HRV             | heart rate variability                         |
| kPa             | kilo pascals                                   |
| LA              | low altitude                                   |
| P <sub>50</sub> | partial pressure at which Hb is half saturated |
| PO <sub>2</sub> | partial pressure of inspired oxygen            |
| STPD            | standard temperature and pressure dry          |
| RMSSD           | root mean square of the standard deviation     |
| SDRR            | standard deviation of the R-R interval         |
| $\dot{V}O_2$    | whole animal oxygen consumption rate           |

## ACKNOWLEDGMENTS

We would like to thank the local collaborators who helped to obtain our study animals: the community of Uros in Puno, Peru, as well as the staff at the Summer Lake Wildlife Refuge, and the Centro de Ornitología y Biodiversidad (CORBIDI). Financial support for the study was provided by the National Sciences and Engineering Research Council of Canada (NSERC) and Kushlan Endowment for Waterbird Biology and Conservation at the University of Miami.

## COMPETING INTERESTS

None declared.

## FUNDING

SLL was supported by NSERC Vanier Canada and Killam Trusts

CI was supported by Ontario Graduate Scholarship and NSERC PGS-D

JMY, LA, RC, NJD and KGM were supported by Kushlan Endowment for Waterbird Biology and Conservation at the University of Miami

APF, GRS and WKM were supported by the NSERC Canada.

## REFERENCES

- Aubert, A. E., Beckers, F., Ramaekers, D., Verheyden, B., Leribaux, C., Aerts, J.-M. and Berckmans, D.** (2004). Heart rate and heart rate variability in chicken embryos at the end of incubation. *Exp. Physiol.* **89**, 199–208.
- Axelsson, M.** (2005). The circulatory system and its control. In *The Physiology of Polar Fishes*, (ed. A.P. Farrell, J.F. Steffensen) pp. 239–280. Academic Press, San Diego.
- Berger, M., Hart, J. S. and Roy, O. Z.** (1970). Respiration, oxygen consumption and heart rate in some birds during rest and flight. *J. Comp. Physiol. A* **66**, 201–214.
- Bernardi, L., Passino, C., Serebrovskaya, Z., Serebrovskaya, T. and Appenzeller, O.** (2001). Respiratory and cardiovascular adaptations to progressive hypoxia. *Eur. Heart. J* **22**, 879–886.
- Black, C. and Tenney, S. M.** (1980). Oxygen transport during progressive hypoxia in high-altitude and sea-level waterfowl. *Respir. Physiol.* **39**, 217–239.
- Brennan, M., Palaniswami, M. and Kamen, P.** (2002). Poincaré plot interpretation using a physiological model of HRV based on a network of oscillators. *Am J Physiol* **283**, H1873–H1886.
- Butler, P. J.** (2001). Diving beyond the limits. *Physiology* **16**, 222–227.
- Butler PJ.** (2010). High fliers: the physiology of bar-headed geese. *Comp Biochem Physiol A Mol Integr Physiol* **156**: 325–329,
- Butler, P. J. and Woakes, A. J.** (1979). Changes in heart rate and respiratory frequency during natural behaviour of ducks, with particular reference to diving. *J. Exp. Biol.* **79**, 283–300.
- Calder, W. A.** (1968). Respiratory and heart rates of birds at rest. *Condor* **70**, 358–365.
- Cornolo, J., Mollard, P., Brugniaux, J. V., Robach, P. and Richalet, J. P.** (2004). Autonomic control of the cardiovascular system during acclimatization to high altitude: effects of sildenafil. *J. Appl. Physiol.* **97**, 935–940.
- Coumel, P., Maison-Blanche, P. and Catuli, D.** (1994). Heart rate and heart rate variability in normal young adults. *J Cardiovasc Electrophysiol* **5**, 899–911.
- Cyr, N. E., Dickens, M. J. and Romero, L. M.** (2009). Heart rate and heart- rate variability responses to acute and chronic stress in a wild- caught passerine bird. *Physiol. Biochem. Zool.* **82**, 332–344.
- Dawson, N.J. Ivy, C.M., Alza, L., Cheek, R., York, J.M., Chua, B., Milsom, W.K., McCracken, K.G. and Scott, G.R.** (2016). Mitochondrial physiology in the skeletal and cardiac muscles is altered in torrent ducks, *Merganetta armata*, from high altitudes in the Andes. *J Exptl Biol* **219**, 3719–3728.

- Dempsey, J.A. and Morgan, B.A.** (2015). Humans In Hypoxia: A Conspiracy Of Maladaptation?! *Physiology* **30**, 304–316.
- Dzal, Y. A., Jenkin, S. E. M., Lague, S. L., Reichert, M. N., York, J. M. and Pamenter, M. E.** (2015). Oxygen in demand: How oxygen has shaped vertebrate physiology. *Comp. Biochem. Physiol. A* **186**, 4–26.
- Faraci, F. M.** (1991). Adaptations to hypoxia in birds: How to fly high. *Annu. Rev. Physiol.* **53**, 59–70.
- Fedde, M., Orr, J. A., Shams, H. and Scheid, P.** (1989). Cardiopulmonary function in exercising bar-headed geese during normoxia and hypoxia. *Respir. Physiol.* **77**, 239–252.
- Graham, A. M., Lavretsky, P., Muñoz-Fuentes, V., Green, A. J., Wilson, R. E., and McCracken, K. G.** (2018) Migration-selection balance drives genetic differentiation in genes associated with high-altitude function in the speckled teal (*Anas flavirostris*) in the Andes. *Genome Biol. Evol.* **10**, 14–32.
- Grubb, B.** (1983). Allometric relations of cardiovascular function in birds. *Am J Physiol* **245**, H567–H572.
- Hawkes, L. A., Balachandran, S., Batbayar, N., Butler, P. J., Frappell, P. B., Milsom, W. K., Tseveenmyadag, N., Newman, S. H., Scott, G. R., Sathiyaselvam, P., et al.** (2011). The trans-Himalayan flights of bar-headed geese (*Anser indicus*). *PNAS* **108**, 9516–9519.
- Hawkins, P. A. J., Butler, P. J., Woakes, A. J. and Speakman, J. R.** (2000). Estimation of the rate of oxygen consumption of the common eider duck (*Somateria mollissima*), with some measurements of heart rate during voluntary dives. *J. Exp. Biol.* **203**, 2819–2832.
- Hughson, R. L., Yamamoto, Y., McCullough, R. E., Sutton, J. R. and Reeves, J. T.** (1994). Sympathetic and parasympathetic indicators of heart rate control at altitude studied by spectral analysis. *J. Appl. Physiol.* **77**, 2537–2542.
- Ivy, C. M., Laguë, S. L., York, J. M., Chua, B., Alza, L., Cheek, R., Dawson, N. J., Frappell, P. B., McCracken, K. G., Milsom, W. K., and Scott, G. S.** (2019) Control of breathing and respiratory gas exchange in ducks native to high altitude in the Andes. *J. Exp. Biol.* **222**, jeb198622. doi:10.1242/jeb.198622.
- Ivy, C. M., York, J. M., Lague, S. L., and, B. C. P.** (2018). Validation of a Pulse Oximetry System for High-Altitude Waterfowl by Examining the Hypoxia Responses of the Andean Goose (*Chloephaga melanoptera*). *Physiol Biochem Zoology* **91**, 859–867.
- Jessen TH, Weber RE, Fermi G, Tame J, Braunitzer G.** (1991). Adaptation of bird hemoglobins to high altitudes: demonstration of molecular mechanism by protein engineering. *Proc Natl Acad Sci USA* **88**: 6519–6522.
- Johnson, K. P. and Sorenson, M. D.** (1999). Phylogeny and biogeography of dabbling ducks (genus: *Anas*): A comparison of molecular and morphological evidence. *Auk* **116**, 792–805.

- Jones, D. R. and Holeyton, G. F.** (1972). Cardiac output of ducks during diving. *Comp. Biochem. Physiol. A* **41**, 639–645.
- Kacimi, R., Richalet, J. P., Corsin, A., Abousahl, I. and Crozatier, B.** (1992). Hypoxia-induced downregulation of beta-adrenergic receptors in rat heart. *J. Appl. Physiol.* **73**, 1377–1382.
- Khandoker, A. H., Karmakar, C., Brennan, M., Voss, A. and Palaniswami, M.** (2013). *Poincaré Plot Methods for Heart Rate Variability Analysis*. New York: Springer Science-Business Media.
- Kiley, J., Kuhlmann, W. and Fedde, M. R.** (1979). Respiratory and cardiovascular responses to exercise in the duck. *J. Appl. Physiol.* **47**, 827–833.
- Kooyman, G. L. and Ponganis, P. J.** (1998). The physiological basis of diving to depth: Birds and mammals. *Annu. Rev. Physiol.* **60**, 19–32.
- Kuo, A. Y., Lee, J. C., Siegel, P. B. and Denbow, D. M.** (2001). Differential cardiovascular effects of pharmacological agents in chickens selected for high and low body weight. *Physiol. Behav.* **79**, 573–579.
- Lague, S. L.** (2017). High-altitude champions: birds that live and migrate at altitude. *Journal of Applied Physiology* **123**, 942–950.
- Lague, S. L., Chua, B., Alza, L., Scott, G. R., Frappell, P. B., Zhong, Y., Farrell, A. P., McCracken, K. G., Wang, Y. and Milsom, W. K.** (2017). Divergent respiratory responses to hypoxia in bar-headed geese and Andean birds. *J. Exp. Biol.* **220**, 4186–4194.
- Lague, S. L., Chua, B., Farrell, A. P., Wang, Y. and Milsom, W. K.** (2016). Altitude matters: differences in cardiovascular and respiratory responses to hypoxia in bar-headed geese reared at high and low altitudes. *J. Exp. Biol.* **219**, 1974–1984.
- Larsen, E. and Galletly, D. C.** (2001). Cardioventilatory coupling in heart rate variability: the value of standard analytical techniques. *Br. J. Anaesth.* **87**, 819–826.
- Lighton, J. R. B.** (2008). Flow-through respirometry using incurrent flow measurement. In *Measuring metabolic rates: A manual for scientists*, pp. 105–124. New York: Oxford University Press.
- Lui, M. A., Mahalingam, S., Patel, P., Connaty, A. D., Ivy, C. M., Cheviron, Z. A., Storz, J. F., McClelland, G. B. and Scott, G. R.** (2015). High-altitude ancestry and hypoxia acclimation have distinct effects on exercise capacity and muscle phenotype in deer mice. *Am J Physiol* **308**, R779–R791.
- Mangin, L., Swynghedauw, B., Benis, A., Thibault, N., Lerebours, G. and Carré, F.** (1998). Relationships between heart rate and heart rate variability: Study in conscious rats. *J Cardiovasc Pharmacol.* **32**, 601–607.
- McCracken, K. G., Barger, C. P., Bulgarella, M., Johnson, K. P., Kuhner, M. K., Moore, A. V., Peters, J. L., Trucco, J., Valqui, T. H., Winker, K., et al.** (2009a).

Signatures of high- altitude adaptation in the major hemoglobin of five species of Andean dabbling ducks. *Amer. Nat.* **174**, 631–650.

**McCracken, K. G., Bulgarella, M., Johnson, K. P., Kuhner, M. K., Trucco, J., Valqui, T. H., Wilson, R. E. and Peters, J. L.** (2009b). Gene flow in the face of countervailing selection: Adaptation to high-altitude hypoxia in the BA hemoglobin subunit of yellow-billed pintails in the Andes. *Mol. Biol. Evol.* **26**, 815–827.

**McCracken, K., Barger, C., Bulgarella, M., Johnson, K. P., Sonsthagen, S. A., Trucco, J., Valqui, T. H., Wilson, R. E. and Sorenson, M. D.** (2009c). Parallel evolution in the major haemoglobin genes of eight species of Andean waterfowl. *Mol. Ecol.* **18**, 3992–4005.

**Meir, J. U. and Ponganis, P. J.** (2009). High-affinity hemoglobin and blood oxygen saturation in diving emperor penguins. *J. Exp. Biol.* **212**, 3330–3338.

**Melin, A., Fauchier, L., Dubuis, E., Obert, P. and Bonnet, P.** (2003). Heart rate variability in rats acclimatized to high altitude. *High Alt. Med. Biol.* **4**, 1–13.

**Morel, O., Leon-Velarde, F., Bienvenu, A., Crozatier, B. and Richalet, J. P.** (1999). Effect of nifedipine on cardiac hypertrophy and alpha-adrenergic system in rats exposed to chronic hypoxia. *Pflügers Arch.* 438, R61

**Munoz-Fuentes, V., Cortázar-Chinarro, M., Lozano-Jaramillo, M. and McCracken, K. G.** (2013). Stepwise colonization of the Andes by Ruddy Ducks and the evolution of novel  $\beta$ -globin variants. *Mol. Ecol.* **22**, 1231–1249.

**Natarajan, C., Projecto-Garcia, J., Moriyama, H., Weber, R. E., Muñoz-Fuentes, V., Green, A. J., Kopuchian, C., Tubaro, P. L., Alza, L., Bulgarella, M., et al.** (2015). Convergent evolution of hemoglobin function in high-altitude Andean waterfowl involves limited parallelism at the molecular sequence level. *PLOS Genetics* **11**, e1005681.

**Natarajan C., A. Jendroszek, A. Kumar, R. E. Weber, J. R. H. Tame, A. Fago, and J. F. Storz.** (2018). Molecular basis of hemoglobin adaptation in the high-flying bar-headed goose. *PloS Genetics* e1007331.

**Perini, R., Milesi, S., Biancardi, L. and Veicsteinas, A.** (1996). Effects of high altitude acclimatization on heart rate variability in resting humans. *Eur J Appl Physiol* **73**, 521–528.

**Pichon, A., Zhenzhong, B., Marchant, D., Jin, G., Voituron, N., Haixia, Y., Favret, F., Richalet, J.-P. and Ge, R.-L.** (2013). Cardiac adaptation to high altitude in the plateau pika (*Ochotona curzoniae*). *Physiol Rep* **1**, e00032.

**Schweizer, R.M., Velotta, J.P., Ivy, C.M., Jones, M.R., Muir, S.M., Bradburd, G.S., Storz, J.F., Scott, G.R. and Cheviron, Z.A.** (2019). Physiological and genomic evidence that the transcription factor *Epas1* contributes to hypoxia adaptation in high-altitude deer mice. *PLoS Genet.* In press.

- Scott, A.L., Prankevicius, N.A., Nurse, C.A. and Scott, G.R.** (2019). Regulation of catecholamine release from the adrenal medulla is altered in deer mice (*Peromyscus maniculatus*) native to high altitudes. *Am. J. Physiol. Reg. Integr. Comp. Physiol.* 317, R407-R417.
- Scott, G.R., Richards, J.G. and Milsom, W.K.** (2009). Control of respiration in flight muscle from the high altitude bar-headed goose and low altitude birds. *Am. J. Physiol. Reg. Integr. Comp. Physiol.* **297**, R1066-R1074.
- Scott, G. R., Hawkes, L. A., Frappell, P. B., Butler, P. J., Bishop, C. M. and Milsom, W. K.** (2015). How bar-headed geese fly over the Himalayas. *Physiology* **30**, 107–115.
- Schuler, B., Arras, M., Keller, S., Rettich, A., Lundby, C., Vogel, J., and Gassman, M.** (2010). Optimal hematocrit for maximal exercise performance in acute and chronic erythropoietin-treated mice. *PNAS* **107**, 419-423.
- Sharshenova, A. A., Majkova, E. J., Kasimov, O. T. and Kudaiberdieva, G.** (2006). Effects of gender and altitude on short-term heart rate variability in children. *Anadolu Kardiyol Derg* **6**, 335–339.
- Shiels, H. A. and White, E.** (2008). The Frank-Starling mechanism in vertebrate cardiac myocytes. *J. Exp. Biol.* **211**, 2005–2013.
- Simonson, T.S., Yang, Y., Huff, C.D., Yun, H., Qin, G., Witherspoon, D.J., Bai, Z., Lorenzo, F.R., Xing, J., Jorde, L.B., and Prchal, J.T, Ge R.** (2010). Genetic evidence for high altitude adaptation in Tibet. *Science* **329**, 72–75.
- Simonson, T.S., Wei, G., Wagner, H.E., Wuren, T., Qin, G., Yan, M., Wagner, P.D., and Ge, R.L.** (2015). Low haemoglobin concentration in Tibetan males is associated with greater high-altitude exercise capacity. *J. Physiol.* **593**, 3207-3218.
- Smith, F. M., West, N. H. and Jones, D. R.** (2000). The cardiovascular system. In *Sturkie's Avian Physiology* (ed. Whittow, G. C.), pp. 141–232. San Diego: Academic Press.
- Stephenson, R., Butler, P. J. and Woakes, A. J.** (1986). Diving behaviour and heart rate in tufted ducks (*Aythya fuligula*). *J. Exp. Biol.* **126**, 341–359.
- Storz, J. F.** (2010). Genes for High Altitudes. *Science* **329**, 40–41.
- Storz, J. F.** (2016). Hemoglobin–oxygen affinity in high-altitude vertebrates: is there evidence for an adaptive trend?. *J Exptl Biol* **219**, 3190-3203.
- Task Force of the European Society of Cardiology** (1996). Heart rate variability standards of measurement, physiological interpretation, and clinical use. *Eur. Heart. J* **17**, 354–381.
- Tazawa, H. and Piiper, J.** (1984). Carbon dioxide dissociation and buffering in chicken blood during development. *Respir Physiol* **57**, 123–134.
- Valance, D., Després, G., Richard, S., Constantin, P., Mignon-Grasteau, S., Leman, S., Boissy, A., Faure, J.-M. and Leterrier, C.** (2008). Changes in heart rate variability during a tonic immobility test in quail. *Physiol. Behav.* **93**, 512–520.

- Weber, R., Jessen, T., Malte, H. and Tame, J.** (1993). Mutant hemoglobins (alpha 119-Ala and beta 55-Ser): functions related to high-altitude respiration in geese. *J. Appl. Physiol.* **75**, 2646–2655.
- Wilson, R. E., Peters, J. L., and McCracken, K. G.** (2013) Genetic and phenotypic divergence between low- and high-altitude populations of two recently diverged cinnamon teal subspecies. *Evolution* **67**, 170-184.
- Wolfel, E. E. and Levine, B. D.** (2001). The cardiovascular system at high altitude. In *High Altitude: An Exploration of Human Adaptation* (eds. Hornbein, T. F. and Schoene, R. B.), pp. 235–292. Boca Raton: Taylor & Francis Group.
- York, J.M., Chua, B.A., Ivy, C.M., Alza, L., Cheek, R., Scott, G.R., McCracken, K.G., Frappell, P.B., Dawson, N.J., Laguë, S.L. and Milsom, W.K.** (2017). Respiratory mechanics of eleven avian species resident at high and low altitude. *J. Exp. Biol.*, **220**, 1079-1089.



## Figures

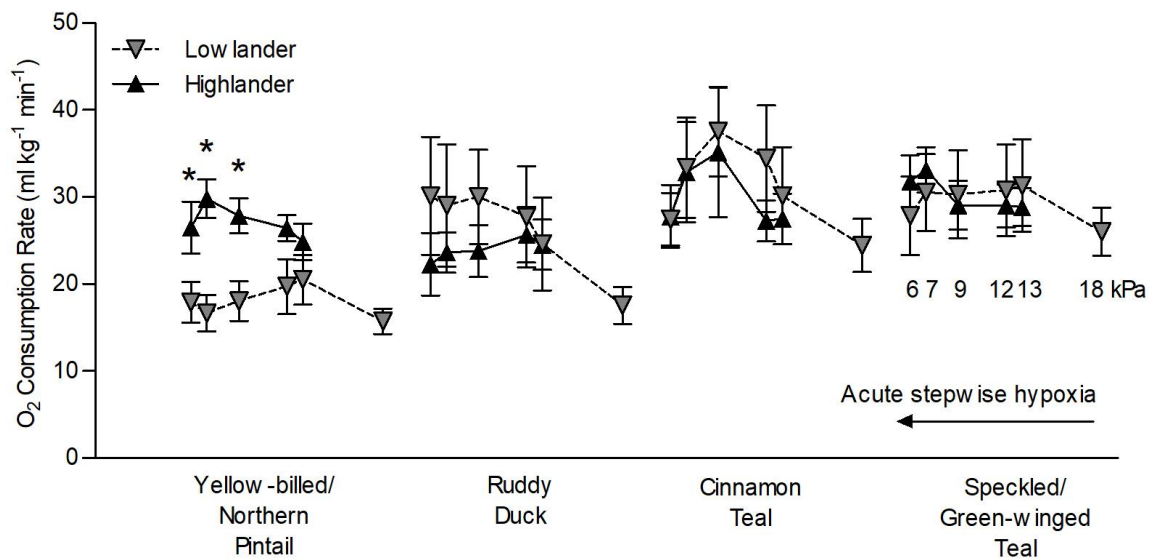

**Figure 1: O<sub>2</sub> consumption during progressive hypoxic exposure.**

O<sub>2</sub> consumption was maintained in all groups throughout progressive decreases in partial pressure of inspired O<sub>2</sub> (PO<sub>2</sub>). Values represent means  $\pm$  s.e.m. High-altitude populations of several duck species are compared to low-altitude populations of the same species or to closely-related low-altitude congeners. Responses to acute hypoxia are shown from right to left for stepwise reductions in inspired O<sub>2</sub> tension (PO<sub>2</sub>): 18 (lowlanders only), 13, 12, 9, 7, and 6 kPa O<sub>2</sub>. Significant differences ( $P < 0.05$ ) in the y-axis variable from values during exposure to ambient air within a species are indicated by open symbols and determined by one-way repeated measures ANOVA. Significant differences ( $P < 0.05$ ) in the y variable between phylogenetic pairs are indicated by an asterisk and determined by two-way repeated measures ANOVA. N=12 high-altitude yellow-billed pintails, n=10 low-altitude northern pintails, n=6 high-altitude ruddy ducks, n=8 low-altitude ruddy ducks, n=12 high-altitude cinnamon teals, n=11 low-altitude cinnamon teals, n=10 high-altitude speckled teals, and n=10 low-altitude green-winged teals.

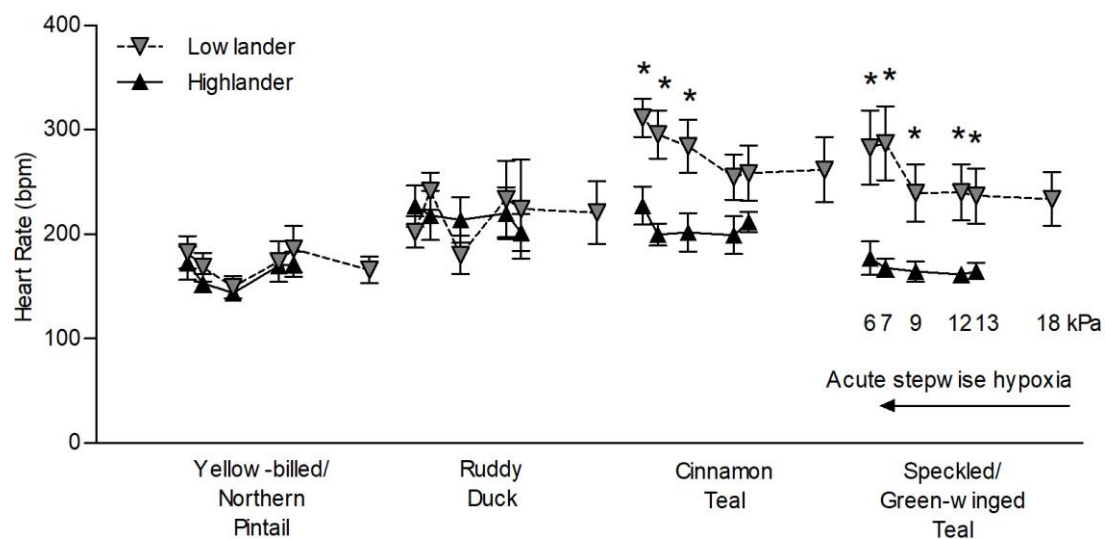

**Figure 2: Heart rate during progressive hypoxic exposure.** Heart rate was maintained in all groups throughout progressive decreases in partial pressure of inspired  $O_2$  ( $PO_2$ ). Values represent means  $\pm$  s.e.m. High-altitude populations of several duck species are compared to low-altitude populations of the same species or to closely-related low-altitude congeners. Responses to acute hypoxia are shown from right to left for stepwise reductions in inspired  $O_2$  tension ( $PO_2$ ): 18 (lowlanders only), 13, 12, 9, 7, and 6 kPa  $O_2$ . Significant differences ( $P < 0.05$ ) in the y-axis variable from values during exposure to ambient air within a species are indicated by open symbols and determined by one-way repeated measures ANOVA. Significant differences ( $P < 0.05$ ) in the y variable between phylogenetic pairs are indicated by an asterisk and determined by two-way repeated measures ANOVA. N=12 high-altitude yellow-billed pintails, n=10 low-altitude northern pintails, n=6 high-altitude ruddy ducks, n=8 low-altitude ruddy ducks, n=12 high-altitude cinnamon teals, n=11 low-altitude cinnamon teals, n=10 high-altitude speckled teals, and n=10 low-altitude green-winged teals.

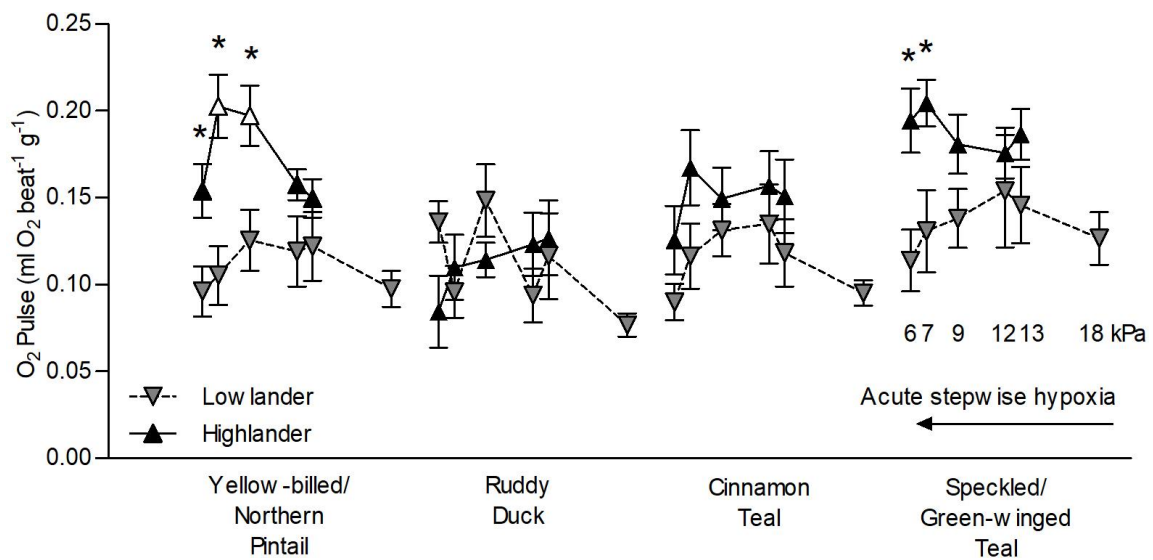

**Figure 3: O<sub>2</sub> pulse during progressive hypoxic exposure.**

O<sub>2</sub> pulse was maintained or increased throughout progressive decreases in partial pressure of inspired O<sub>2</sub> (PO<sub>2</sub>). Values represent means  $\pm$  s.e.m. High-altitude populations of several duck species are compared to low-altitude populations of the same species or to closely-related low-altitude congeners. Responses to acute hypoxia are shown from right to left for stepwise reductions in inspired O<sub>2</sub> tension (PO<sub>2</sub>): 18 (lowlanders only), 13, 12, 9, 7, and 6 kPa O<sub>2</sub>. Significant differences ( $P < 0.05$ ) in the y-axis variable from values during exposure to ambient air within a species are indicated by open symbols and determined by one-way repeated measures ANOVA. Significant differences ( $P < 0.05$ ) in the y variable between phylogenetic pairs are indicated by an asterisk and determined by two-way repeated measures ANOVA. N=12 high-altitude yellow-billed pintails, n=10 low-altitude northern pintails, n=6 high-altitude ruddy ducks, n=8 low-altitude ruddy ducks, n=12 high-altitude cinnamon teals, n=11 low-altitude cinnamon teals, n=10 high-altitude speckled teals, and n=10 low-altitude green-winged teals.

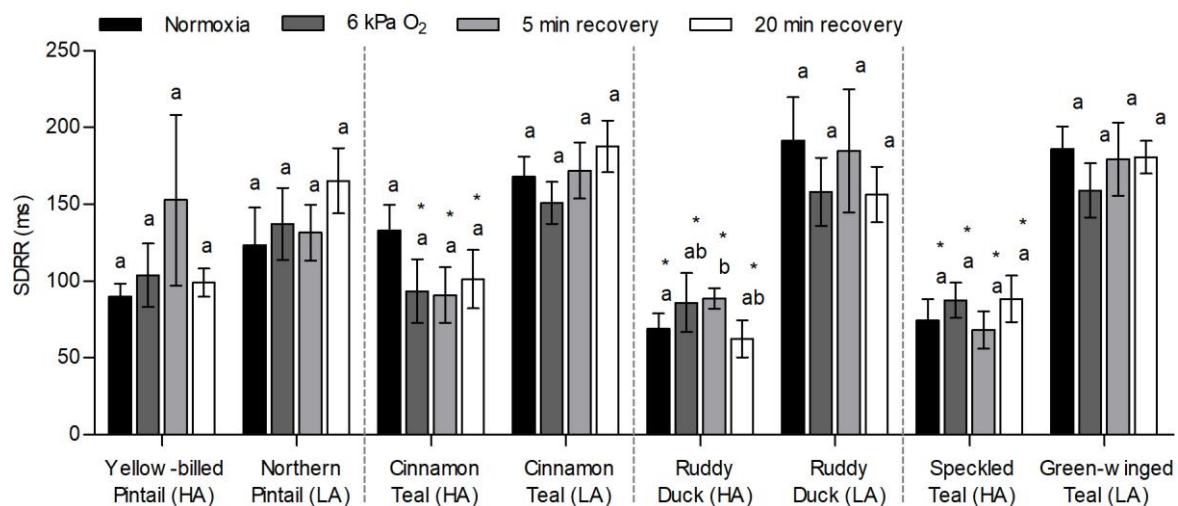

**Figure 4: Standard deviation of RR intervals (SDRR) in normoxia, severe hypoxia and ambient recovery.**

SDRR is represented for all study groups under ambient conditions (18 kPa for low altitude (LA) and 13 kPa for high altitude (HA)), at 6 kPa inspired O<sub>2</sub>, following 5-min of ambient recovery, and following 20-min of ambient recovery. All values are means  $\pm$  s.e.m.

Significant differences ( $P < 0.05$ ) in the y-axis variable from values during exposure to ambient air within a species are indicated different letters and determined by one-way repeated measures ANOVA. Significant differences ( $P < 0.05$ ) in the y variable between phylogenetic pairs are indicated by an asterisk and determined by two-way repeated measures ANOVA. N=12 high-altitude yellow-billed pintails, n=10 low-altitude northern pintails, n=6 high-altitude ruddy ducks, n=8 low-altitude ruddy ducks, n=12 high-altitude cinnamon teals, n=11 low-altitude cinnamon teals, n=10 high-altitude speckled teals, and n=10 low-altitude green-winged teals.

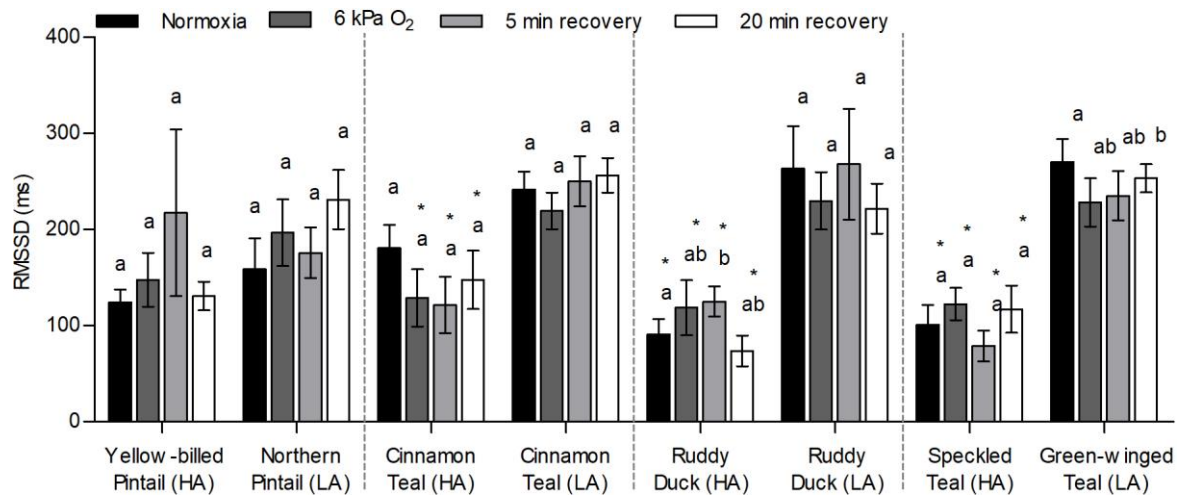

**Figure 5: Root mean square of successive differences in RR intervals (RMSSD) in normoxia, severe hypoxia and ambient recovery.** RMSSD is represented for all study groups for ambient conditions (18 kPa for low altitude (LA) and 13 kPa for high altitude (HA)), at 6 kPa inspired O<sub>2</sub>, following 5-min of ambient recovery, and following 20-min of ambient recovery. All values are means  $\pm$  s.e.m. Significant differences ( $P < 0.05$ ) in the y-axis variable from values during exposure to ambient air within a species are indicated different letters and determined by one-way repeated measures ANOVA. Significant differences ( $P < 0.05$ ) in the y variable between phylogenetic pairs are indicated by an asterisk and determined by two-way repeated measures ANOVA. N=12 high-altitude yellow-billed pintails, n=10 low-altitude northern pintails, n=6 high-altitude ruddy ducks, n=8 low-altitude ruddy ducks, n=12 high-altitude cinnamon teals, n=11 low-altitude cinnamon teals, n=10 high-altitude speckled teals, and n=10 low-altitude green-winged teals.

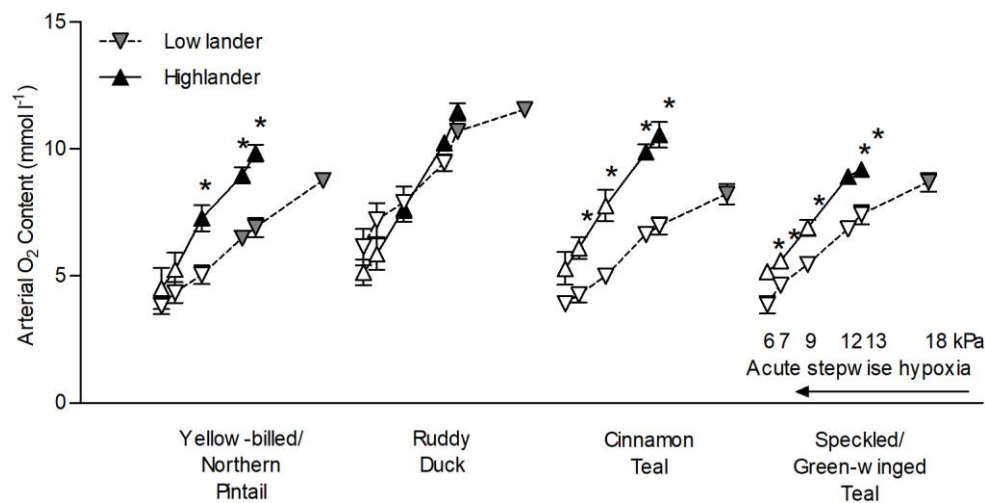

**Figure 6: Arterial O<sub>2</sub> content during progressive hypoxic exposure.**

Arterial O<sub>2</sub> content (mmol l<sup>-1</sup>) to acute hypoxia are shown from right to left for stepwise reductions in inspired partial pressure of O<sub>2</sub> (PO<sub>2</sub>): Values represent means  $\pm$  s.e.m. High-altitude populations of several duck species are compared to low-altitude populations of the same species or to closely-related low-altitude congeners. Responses to acute hypoxia are shown from right to left for stepwise reductions in inspired O<sub>2</sub> tension (PO<sub>2</sub>): 18 (lowlanders only), 13, 12, 9, 7, and 6 kPa O<sub>2</sub>. Significant differences ( $P < 0.05$ ) in the y-axis variable from values during exposure to ambient air within a species are indicated by open symbols and determined by one-way repeated measures ANOVA. Significant differences ( $P < 0.05$ ) in the y variable between phylogenetic pairs are indicated by an asterisk and determined by two-way repeated measures ANOVA. Only the ruddy duck shows no difference in arterial O<sub>2</sub> content at low to moderate inspired partial pressure. N=12 high-altitude yellow-billed pintails, n=10 low-altitude northern pintails, n=6 high-altitude ruddy ducks, n=8 low-altitude ruddy ducks, n=12 high-altitude cinnamon teals, n=11 low-altitude cinnamon teals, n=10 high-altitude speckled teals, and n=10 low-altitude green-winged teals.

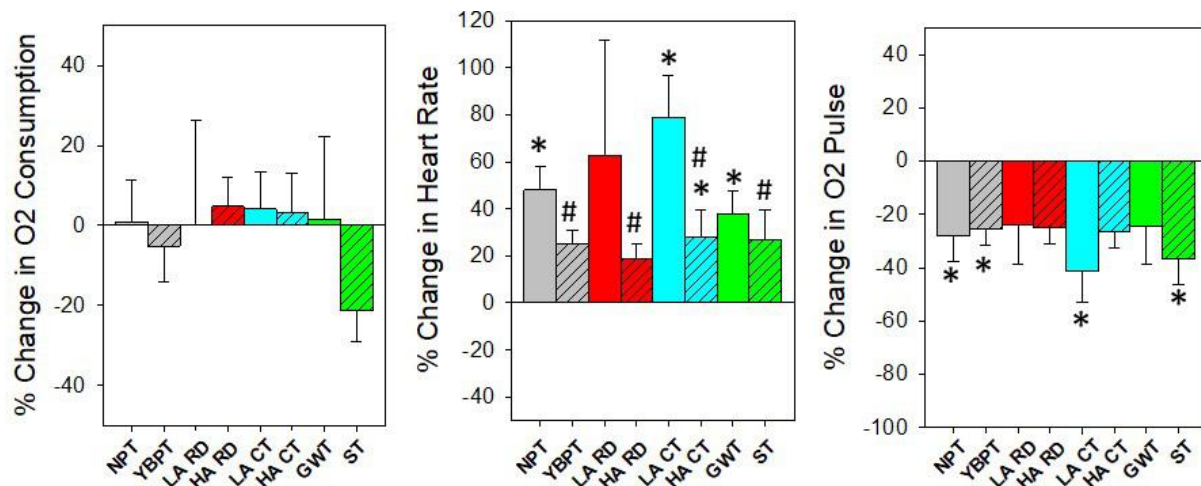

**Figure 7: Percent change in heart rate and O<sub>2</sub> pulse during post-hypoxic recovery.**

Percent change from starting levels of O<sub>2</sub> consumption, heart rate and the O<sub>2</sub> pulse 20-min post-hypoxic recovery. Values represent means  $\pm$  s.e.m with low-altitude (LA) groups indicated by solid bars: gray (northern pintail; NPT; n=10), red (ruddy duck; LA RD; n=8), light blue (cinnamon teal; LA CT; n=12), and green (green-winged teal; GWT; n=10). High-altitude (HA) groups are indicated by dashed bars: gray (yellow-billed pintail; YBPT; n=12), red (ruddy duck; HA RD; n=6), light blue (cinnamon teal; HA CT; n=12), and green (speckled teal; ST; n=10). Significant differences ( $P < 0.05$ ) in the y-axis variable from values during exposure to ambient air within a species are indicated by an asterisk and determined by one-way ANOVA. Significant differences between low- and high-altitude pairs are indicated by # and determined by two-way ANOVA.



## Tables

**Table 1: Differences in haematological parameters, body mass, and relative heart mass in high- and low-altitude ducks.** Hb, haemoglobin; P<sub>50</sub>, the PO<sub>2</sub> at which Hb is half-saturated with O<sub>2</sub> (values obtained from Natarajan et al. (Natarajan et al., 2015)). Significant differences (P<0.05) in the variable between phylogenetic pairs are indicated by an asterisk and determined by two-way repeated measures ANOVA. N=10 low-altitude northern pintails, n=11 low-altitude cinnamon teals, n=8 low-altitude ruddy ducks, n=10 green-winged teals, n=12 yellow-billed pintails, n=12 high-altitude cinnamon teals, n=6 high-altitude ruddy ducks, and n=10 speckled teals.

| Group                 | Haematocrit (%) | Blood Hb content (g dl <sup>-1</sup> ) | Hb P <sub>50</sub> (kPa) | Body mass (kg) | Relative heart mass (g kg <sup>-1</sup> ) |
|-----------------------|-----------------|----------------------------------------|--------------------------|----------------|-------------------------------------------|
| <b>Low altitude</b>   |                 |                                        |                          |                |                                           |
| Northern pintail      | 43.7 ± 1.3*     | 15.1 ± 0.5*                            | ----                     | 0.842 ± 0.01   | 10.7 ± 0.1                                |
| Cinnamon teal         | 43.1 ± 1.5*     | 14.0 ± 0.5*                            | 4.95                     | 0.305 ± 0.01   | 9.2 ± 0.4                                 |
| Ruddy duck            | 55.6 ± 4.0      | 19.6 ± 0.3                             | 3.81                     | 0.450 ± 0.03   | 11.4 ± 0.4                                |
| Green-winged teal     | 45.9 ± 1.7*     | 15.2 ± 0.5*                            | ----                     | 0.343 ± 0.05   | 10.3 ± 0.5*                               |
| <b>High altitude</b>  |                 |                                        |                          |                |                                           |
| Yellow-billed pintail | 56.3 ± 1.7*     | 18.4 ± 0.3*                            | 4.68                     | 0.605 ± 0.02   | 10.4 ± 0.6                                |
| Cinnamon teal         | 56.1 ± 1.2*     | 19.4 ± 0.4*                            | 3.88                     | 0.435 ± 0.01   | 11.1 ± 0.7                                |
| Ruddy duck            | 55.1 ± 1.8      | 20.4 ± 0.7                             | 4.01                     | 0.728 ± 0.06   | 9.6 ± 0.4                                 |
| Speckled teal         | 53.7 ± 2.3*     | 17.8 ± 0.8*                            | 4.12                     | 0.372 ± 0.01   | 12.8 ± 0.5*                               |

| Group                                                                    | Partial Pressure of Inspired O <sub>2</sub> (kPa) |         |        |        |        |        |
|--------------------------------------------------------------------------|---------------------------------------------------|---------|--------|--------|--------|--------|
|                                                                          | 21                                                | 13      | 13     | 9      | 7      | 6      |
| <b>Arterial O<sub>2</sub> Saturation – Low-Altitude Populations (%)</b>  |                                                   |         |        |        |        |        |
| Northern pintail                                                         | 94 ± 1                                            | 74 ± 3  | 70 ± 1 | 54 ± 4 | 47 ± 4 | 42 ± 4 |
| Cinnamon teal                                                            | 95 ± 1                                            | 80 ± 2  | 76 ± 2 | 57 ± 1 | 49 ± 3 | 45 ± 2 |
| Ruddy duck                                                               | 95 ± 1                                            | 87 ± 1  | 78 ± 1 | 65 ± 4 | 57 ± 5 | 51 ± 5 |
| Green-winged teal                                                        | 92 ± 1                                            | 80 ± 3  | 73 ± 1 | 58 ± 2 | 49 ± 1 | 41 ± 3 |
| Gadwall                                                                  | 94 ± 2                                            | 75 ± 2  | 72 ± 2 | 56 ± 3 | 46 ± 3 | 47 ± 3 |
| Mallard                                                                  | 94 ± 1                                            | 73 ± 3  | 69 ± 3 | 58 ± 3 | 50 ± 4 | 44 ± 4 |
| <b>Arterial O<sub>2</sub> Saturation – High-Altitude Populations (%)</b> |                                                   |         |        |        |        |        |
| Yellow-billed pintail                                                    | ---                                               | 85 ± 2* | 77 ± 2 | 63 ± 4 | 45 ± 5 | 38 ± 4 |
| Cinnamon teal                                                            | ---                                               | 86 ± 3  | 80 ± 1 | 63 ± 4 | 50 ± 3 | 43 ± 5 |
| Ruddy duck                                                               | ---                                               | 90 ± 2  | 80 ± 3 | 60 ± 4 | 46 ± 5 | 41 ± 5 |
| Speckled teal                                                            | ---                                               | 83 ± 2  | 81 ± 2 | 62 ± 3 | 51 ± 2 | 47 ± 2 |
| Puna teal                                                                | ---                                               | 83 ± 1  | 77 ± 1 | 64 ± 3 | 46 ± 6 | 42 ± 6 |

**Table S1: Arterial oxygen saturation (%) during stepwise hypoxia exposure for the different species of high- and low-altitude ducks.** Significant differences ( $P < 0.05$ ) in arterial O<sub>2</sub> saturation between high- and low-altitude pairs at a given partial pressure of inspired oxygen ( $P_{iO_2}$ ) are indicated by an asterisk as determined by Holm-Sidak post hoc tests. N=10 northern pintails, n=8 low-altitude ruddy ducks, n=11 low-altitude cinnamon teals, n=10 green-winged teals, n=8 gadwalls, n=8 mallard ducks, n=12 yellow-billed pintails, n=6 high-altitude ruddy ducks, n=12 high-altitude cinnamon teals, n=10 speckled teals, and n=8 Puna teals.

| PO <sub>2</sub> (kPa)                                                          | Puna teal       | Gadwall        | Mallard         |
|--------------------------------------------------------------------------------|-----------------|----------------|-----------------|
| <b>O<sub>2</sub> Consumption (ml kg<sup>-1</sup> min<sup>-1</sup>)</b>         |                 |                |                 |
| 18                                                                             | ---             | 17.56 ± 1.89   | 15.17 ± 3.00    |
| 13                                                                             | 26.95 ± 1.79    | 20.07 ± 2.38   | 18.58 ± 3.27    |
| 12                                                                             | 25.08 ± 2.75    | 17.70 ± 3.23   | 19.34 ± 2.28    |
| 9                                                                              | 28.77 ± 4.00    | 19.21 ± 3.44   | 21.41 ± 3.40    |
| 7                                                                              | 24.43 ± 3.12    | 19.37 ± 2.51   | 21.87 ± 3.08    |
| 6                                                                              | 22.78 ± 2.71    | 16.84 ± 2.71   | 20.67 ± 4.65    |
| <b>Heart Rate (min<sup>-1</sup>)</b>                                           |                 |                |                 |
| 18                                                                             | ---             | 206.67 ± 25.53 | 191.65 ± 22.33  |
| 13                                                                             | 225.16 ± 10.37  | 181.95 ± 24.79 | 184.28 ± 22.74  |
| 12                                                                             | 214.85 ± 10.27  | 158.44 ± 15.38 | 187.47 ± 22.30  |
| 9                                                                              | 238.38 ± 10.58  | 173.93 ± 16.84 | 215.40 ± 31.66  |
| 7                                                                              | 261.17 ± 16.55* | 186.50 ± 23.44 | 228.51 ± 24.76  |
| 6                                                                              | 278.84 ± 15.48* | 239.65 ± 24.55 | 305.73 ± 33.30* |
| <b>O<sub>2</sub> Pulse (ml O<sub>2</sub> beat<sup>-1</sup> g<sup>-1</sup>)</b> |                 |                |                 |
| 18                                                                             | ---             | 0.09 ± 0.01    | 0.08 ± 0.02     |
| 13                                                                             | 0.13 ± 0.01     | 0.12 ± 0.02    | 0.10 ± 0.01     |
| 12                                                                             | 0.12 ± 0.01     | 0.12 ± 0.02    | 0.11 ± 0.02     |
| 9                                                                              | 0.13 ± 0.02     | 0.12 ± 0.02    | 0.10 ± 0.02     |
| 7                                                                              | 0.10 ± 0.02     | 0.11 ± 0.02    | 0.11 ± 0.020    |
| 6                                                                              | 0.09 ± 0.01*    | 0.07 ± 0.01    | 0.07 ± 0.02     |
| <b>Arterial O<sub>2</sub> Content (mmol l<sup>-1</sup>)</b>                    |                 |                |                 |
| 18                                                                             | ---             | 8.89 ± 0.26    | 8.83 ± 0.33     |
| 13                                                                             | 8.81 ± 0.09     | 7.20 ± 0.37*   | 6.86 ± 0.41     |
| 12                                                                             | 8.20 ± 0.06     | 6.88 ± 0.26*   | 6.43 ± 0.40     |
| 9                                                                              | 6.56 ± 0.35     | 5.34 ± 0.45*   | 5.40 ± 0.36*    |
| 7                                                                              | 4.65 ± 0.55*    | 4.38 ± 0.33*   | 4.69 ± 0.44*    |
| 6                                                                              | 4.23 ± 0.55*    | 4.45 ± 0.35*   | 4.16 ± 0.51*    |
| <b>SDRR (ms)</b>                                                               |                 |                |                 |
| Normoxia                                                                       | 107.60 ± 15.85  | 126.60 ± 22.17 | 150.46 ± 30.88  |
| 6 kPa O <sub>2</sub>                                                           | 79.62 ± 24.18   | 101.72 ± 24.28 | 145.24 ± 43.43  |
| 5-min recovery                                                                 | 96.37 ± 19.06   | 137.68 ± 19.53 | 139.35 ± 29.81  |
| 20-min recovery                                                                | 83.97 ± 16.52   | 149.95 ± 23.06 | 123.34 ± 24.10  |
| <b>RMSSD (ms)</b>                                                              |                 |                |                 |
| Normoxia                                                                       | 136.13 ± 23.10  | 175.63 ± 33.94 | 198.76 ± 43.76  |
| 6 kPa O <sub>2</sub>                                                           | 103.13 ± 34.38  | 143.89 ± 34.53 | 211.53 ± 63.85  |
| 5-min recovery                                                                 | 126.45 ± 31.48  | 185.43 ± 29.12 | 203.36 ± 44.52  |
| 20-min recovery                                                                | 99.44 ± 24.78   | 195.35 ± 30.02 | 174.92 ± 32.91  |

**Table S2: Measurements of oxygen consumption, heart rate, oxygen pulse, arterial oxygen content, SDRR (standard deviation of the R-R interval), and RMSSD (root mean square of the standard deviation) during stepwise hypoxia exposure in the Puna teal, gadwall and mallard.** These represent the species recorded in our study for which there were no low/high-altitude pair. Significant differences ( $P < 0.05$ ) in the y variable between phylogenetic pairs are indicated by an asterisk and determined by two-way repeated measures ANOVA. N=8 high-altitude Puna teal, n=8 low-altitude gadwall, and n=8 low-altitude mallard duck.

| Species              | Haematocrit<br>(%) | Blood Hb<br>content<br>(g dl <sup>-1</sup> ) | Hb P <sub>50</sub><br>(kPa) | Body mass<br>(kg) | Relative<br>heart mass<br>(g kg <sup>-1</sup> ) |
|----------------------|--------------------|----------------------------------------------|-----------------------------|-------------------|-------------------------------------------------|
| <b>Low altitude</b>  |                    |                                              |                             |                   |                                                 |
| Gadwall              | 44.6 ± 1.9         | 15.3 ± 0.4                                   | ----                        | 0.754 ± 0.04      | ----                                            |
| Mallard              | 46.5 ± 2.4         | 15.1 ± 0.6                                   | ----                        | 0.947 ± 0.02      | 7.4 ± 0.4                                       |
| <b>High altitude</b> |                    |                                              |                             |                   |                                                 |
| Puna teal            | 49.8 ± 1.3         | 17.0 ± 0.3                                   | 3.61                        | 0.404 ± 0.01      | 9.8 ± 0.6                                       |

**Table S3: Differences in haematological parameters, body mass, and relative heart mass in Puna teal, gadwall, and mallard ducks.** Hb, haemoglobin; P<sub>50</sub>, the PO<sub>2</sub> at which Hb is half-saturated with O<sub>2</sub> (values obtained from Natarajan et al. (Natarajan et al., 2015). N=8 high-altitude Puna teal, n=8 low-altitude gadwall, and n=8 low-altitude mallard duck.
